# Supplementary material for: Assessing the multi-scale predictive ability of ecosystem functional attributes for species distribution modelling
Source: PLoS One. 2018 Jun 18;13(6):e0199292. doi: 10.1371/journal.pone.0199292 (PMC6005496; doi:10.1371/journal.pone.0199292)
Supplement: S1 Dataset — (CSV) [file pone.0199292.s001.csv]

X	Y	Ib	Extent	Scale	agric	ALBmx	area_mn	baresoil	EVIdmxs	EVImn	EVImx	forest	LSTmn	LSTsd	PpDM	PpS	PpWM	scrubs	shdi	TAR	TmDQ	TmWQ
164500	4725500	1	NW	1km	0	281.75	14.00139999	0	-0.239720205	470.7161458	5862.763021	590000	14002.1875	412.6449752	35.72777176	38	220.2398987	60000	1.081099987	243.5325012	151.8666992	27.67741966
163500	4725500	1	NW	1km	0	263.109375	33.65999985	0	-0.188172735	59.28125	4982.671875	460000	13520.5	406.131397	36.81407166	38	222.8833008	0	0.690599978	242.7664032	148.7913971	109.1235962
162500	4721500	1	NW	1km	0	248.59375	49.00500107	0	-0.322373546	498.9537037	4657.671296	10000	13559375	408.2948807	36.63428116	39	155.9127045	0	0.0243	242.290802	147.1524963	109.1235962
160500	4669500	1	NW	1km	240000	141.34375	10.40400028	0	0.127168086	1533.579327	5796.598558	580000	13685875	457.5020229	36.81407166	0	220.0583038	0	0.979499996	259.3591919	178.4654999	45.09547043
107500	4655500	1	NW	1km	410000	157.15625	10.89000034	0	0.175676632	1976.784722	5212.368056	140000	13763.75	442.0103213	25.69010925	0	172.7731934	0	1.007300019	231.9403076	171.9658966	51.61977005
103500	4655500	1	NW	1km	320000	165	14.42570019	0	-0.012634496	1585.578125	5282.582589	0	13698625	431.6174183	26.71194077	48	180.091095	0	1.43809998	228.2881012	167.4134979	48.2424202
98500	4768500	1	NW	1km	0	151.140625	100.9800034	0	-0.118936495	1806.217672	4504.971983	0	13758.78125	387.6755383	37.01684952	0	176.949707	0	0	205	168.050293	69.98314667
88500	4647500	1	NW	1km	0	165.828125	20.19599915	0	-0.161688691	846.265625	4459.643229	50000	13635125	454.1049742	31.30426979	48	203.355896	0	0.714399993	219.0397949	153.8527069	33.93996048
88500	4646500	1	NW	1km	0	171.90625	20.19599915	0	-0.128183416	1026.565104	5251.348958	240000	13595.21875	459.9293217	30.13835907	48	201.5744019	90000	0.79339999	219.921402	156.7044067	35.36584091
87500	4648500	1	NW	1km	0	134.6875	25.24500084	0	-0.169395826	917.48	4091.96	120000	13627.1875	471.911226	30.80978966	48	204.2400055	0	0.875699997	218.3838959	153.9553986	33.95682907
87500	4649500	1	NW	1km	50000	163.71875	49.00500107	0	-0.180926514	1166.743056	3912.666667	0	13696.6875	450.5364148	29.70956039	0	200.7505035	0	0.160400003	220.0234985	158.6687927	39.05538177
87500	4646500	1	NW	1km	0	178375	32.66999817	0	-0.068722253	864.6153846	4292.677885	0	13597625	472.7943058	29.23621941	48	200.4356995	280000	0.599799991	219.9880981	158.5155945	37.58581161
87500	4645500	1	NW	1km	0	166	16.82999992	0	-0.077308303	1025.240385	4256.293269	180000	13620.3125	475.9386312	28.99012947	0	199.9100037	280000	0.967100024	220.0498962	158.8535004	37.85345078
86500	4647500	1	NW	1km	0	159.046875	12.25119972	0	-0.086650635	589.7825	3279.1475	0	13535.53125	475.8052734	32.53643036	48	208.6788025	0	0.479600012	217.383606	149.7337036	34.53034973
86500	4646500	1	NW	1km	0	179.90625	24.50250053	0	-0.118582036	910.2283654	3951.581731	0	13543125	479.1719079	32.21920013	48	208.2313995	0	0.619300008	216.7922058	149.8128052	37.58898926
86500	4648500	1	NW	1km	0	146.046875	16.82999992	0	-0.180989583	913.140625	3538.880208	0	13661.46875	472.412766	30.48390007	48	203.8399963	0	0.693099976	219.516098	155.803894	35.30031967
86500	4645500	1	NW	1km	0	146.2916667	25.24500084	0	-0.137366436	1094.158854	3638.911458	0	13661.95833	479.9540675	29.85477066	0	201.9431	260000	0.555899978	219.7147064	157.8630066	37.21569824
86500	4642500	1	NW	1km	0	151.78125	100.9800034	0	-0.031411921	1153.885417	3050.643229	0	13740.75	505.9127958	27.60994911	49	195.7723999	0	0	222.131897	164.5411072	42.83753967
85500	4642500	1	NW	1km	0	182.40625	104.0400009	0	-0.069078853	966.1510417	2984.583333	0	13611.1875	505.258092	28.5331192	0	199.8096008	0	0	220.2566071	160.1903992	39.94641876
84500	4642500	1	NW	1km	0	172.40625	100.9800034	0	0.010245191	806.9225	2669815	0	13530.0625	507.9330129	29.97370911	0	205.1340027	0	0	219.0814056	155.6878967	35.68788147
82500	4642500	1	NW	1km	0	156.75	104.0400009	0	-0.070474421	673.9817708	2764.627604	0	13536625	493.4826999	32.81977081	48	213.3406067	0	0	216.1741028	148.7747955	32.11748886
82500	4641500	1	NW	1km	10000	202.296875	50.49000168	0	-0.106328456	621.4479167	2850.682292	0	13557.96875	487.3538636	31.16777039	0	209.8527069	0	0.298400015	217.2951965	152.7637024	33.51099014
82500	4639500	1	NW	1km	0	180.96875	34.68000031	0	-0.088423132	743.9479167	2671.221354	0	13636.65625	496.2268686	29.3441391	49	205.8244019	0	0.716400027	218.6755066	156.6233978	37.07123947
82500	4638500	1	NW	1km	10000	206	50.49000168	0	-0.09667801	852.9479167	2795.708333	0	13679.03125	487.0503171	28.79795074	49	205.2525024	0	0.67809999	219.2019958	158.0001068	38.04043961
82500	4637500	1	NW	1km	0	168.609375	50.49000168	0	-0.108881397	976.2175	2747.7075	0	13688.40625	482.520827	26.62768936	0	197.7613983	0	0.644200027	221.3722992	164.8222961	44.12654114
81500	4642500	1	NW	1km	10000	223.40625	33.65999985	80000	-0.106583863	485.7578125	2954.023438	0	14008.6875	488.7796018	34.55556107	48	220.0583038	0	0.494300008	214.8598022	212.7465057	57.06906128
81500	4641500	1	NW	1km	0	194.03125	49.00500107	0	-0.140020941	508.9807692	2995.644231	0	14009.59375	488.6810567	32.2537117	0	214.4438934	0	0.549600005	215.6271973	148.540802	31.13442039
81500	4643500	1	NW	1km	0	170.40625	16.33499908	510000	-0.156386872	484.4375	2977.164063	0	13504.25	475.5883919	33.13911057	48	214.4369049	0	0.982500017	215.2053986	147.5630951	62.6991806
81500	4640500	1	NW	1km	0	195.40625	32.66999817	0	-0.15268428	504.7692308	2731.524038	0	13551.1875	498.1893479	30.9766407	49	210.1772003	0	0.759899974	217.5814972	152.8227997	33.62815857
81500	4644500	1	NW	1km	0	164.21875	19.60199928	150000	-0.15597844	760.8263889	3474.516204	0	13574.34375	471.3819258	30.98583984	0	208.4342041	0	0.547599971	217.2115021	154.0729065	35.0424881
80500	4642500	1	NW	1km	0	175.921875	33.65999985	0	-0.16736624	530.1418269	3210.841346	0	13504.9375	472.8279909	34.24351883	48	219.1510925	0	0.578599989	214.1679993	214.7042999	32.42840958
80500	4640500	1	NW	1km	10000	208.9375	24.50250053	0	-0.217023876	396.4192708	2810.057292	0	14005	499.2577353	33.21731949	48	218.3226929	0	0.716899991	214.8634033	214.9638062	54.5761795
80500	4639500	1	NW	1km	0	184.75	33.65999985	0	-0.119766617	342.4166667	2569.872396	0	13548.09375	497.8052697	32.36555862	48	216.7310944	0	0.470099986	215	147.5744019	31.67291069
80500	4643500	1	NW	1km	0	161.53125	12.25119972	270000	-0.146063691	599.4296875	2975.5625	0	13574.1875	454.943152	33.08958817	48	214.9942932	0	1.034000039	214.7873993	147.4266052	33.86112976
80500	4644500	1	NW	1km	0	158625	19.60199928	490000	-0.095082557	612.7961957	3063.038043	0	13662.25	459.9347487	32.19527054	0	211.5301056	0	0.857599974	215.6652069	150.9129944	32.91304016
80500	4645500	1	NW	1km	0	157	20.19599915	130000	-0.073500454	928.0066964	3700.098214	0	13719375	447.5479494	30.1956501	0	206.3518066	0	0.808200002	217.370697	157.1678925	38.99575043
79500	4638500	1	NW	1km	10000	212.015625	100.9800034	0	-0.139272818	395.9609375	6834.69213	0	13581.1875	494.8805261	32.90171051	0	219.7050934	0	0	214.4532013	214.9411926	31.37273026
79500	4640500	1	NW	1km	0	181.46875	25.24500084	320000	-0.118975348	532.1979167	2875.536458	0	13560.5625	469.0022576	33.01102829	48	217.9382935	0	0.605799973	214.202301	220.980896	55.8205719
79500	4641500	1	NW	1km	0	188.8125	16.82999992	470000	-0.114813691	458.9140625	2786.361979	0	13512.3125	487.906859	32.93695068	48	216.3990021	0	1.119600058	215.072998	147.3950958	84.56858826
79500	4637500	1	NW	1km	0	184.1041667	100.9800034	0	-0.114903831	626.4320652	2492.410326	0	13693.5625	485.3190021	30.84456062	49	213.4403076	0	0	216.561203	151.7185059	33.15559006
79500	4642500	1	NW	1km	0	167.40625	20.80800056	0	-0.115221143	707.1775	3148.9225	0	14063.09375	473.1016524	31.95833969	0	212.1239014	0	0.506099999	215.8157043	150.9031982	32.8990097
79500	4643500	1	NW	1km	0	161.53125	14.42570019	0	-0.063678801	848.3149038	3118.03125	0	13574.1875	454.943152	31.1146698	0	210.5518036	0	0.816200018	216.1564941	153.3020935	34.92712021
79500	4636500	1	NW	1km	0	174.421875	34.68000031	0	-0.072720621	811.6339286	2808.825893	0	13682.78125	477.7565359	28.99558067	49	207.6007996	0	0.510800004	218.6096039	157.6329956	38.1424408
78500	4642500	1	NW	1km	0	153.5625	33.65999985	0	-0.073078588	637.609375	2912.497396	0	13527.15625	466.8209474	29.68955994	49	206.8506927	0	0.690100014	217.7646942	157.9313049	39.76929092
78500	4673500	1	NW	1km	0	142	49.00500107	0	-0.174150635	928.82	3958505	0	13649125	412.3935988	29.80717087	47	203.6013947	0	0.0134	220.7891998	170.3630981	58.82175827
78500	4643500	1	NW	1km	0	165.3125	16.33499908	120000	-0.083553678	1153.745192	3347.716346	0	13587.53125	448.5638369	28.06368065	49	203.4750977	0	1.044399977	218.9362946	162.9385986	44.06822968
77500	4640500	1	NW	1km	0	167.21875	32.66999817	720000	-0.089189352	719.2057292	2940.84375	0	13618.25	446.1625724	30.72670937	0	211.2751007	280000	0.628400028	216.6855927	154.451004	36.41107941
77500	4642500	1	NW	1km	0	137.1875	25.24500084	10000	0.034807358	872.546875	2763.239583	0	13537	460.5432706	29.07255936	49	206.0469971	0	0.781700015	217.8394012	159.8703003	41.94828033
77500	4643500	1	NW	1km	0	116.40625	24.50250053	0	-0.050151902	1056.635417	3210.544271	0	13653.4375	432.7203696	28.4565506	49	203.9131012	0	1.040199995	217.904007	162.6161041	45.24129105
77500	4634500	1	NW	1km	0	137.1875	49.00500107	0	0.087272492	1013.926339	3222.207589	0	13632.6875	480.8119524	35.72777176	0	222.8833008	0	1.166100025	223.2050934	171.3222961	50.8139801
76500	4641500	1	NW	1km	0	161.984375	25.24500084	890000	-0.065980762	657.9425	6799.432292	0	13559.21875	459.6785284	31.61170006	0	213.6374054	0	0.399899989	213.9530029	151.0119934	33.68730927
76500	4639500	1	NW	1km	0	175125	26.01000023	0	-0.074886207	474.6175	2976245	0	13637.5625	467.8944214	29.71446991	0	209.5187988	250000	0.576099992	217.0744934	156.4172058	38.61264038
76500	4636500	1	NW	1km	0	162.84375	34.68000031	0	0.020858383	781.4322917	2856.085938	0	13563.5	496.4361392	29.10327911	0	208.1116028	360000	0.65079999	217.0731964	158.7120056	40.06216049
76500	4640500	1	NW	1km	0	135.0208333	25.24500084	440000	-0.005532176	904.9895833	3282.020833	0	13582.29167	444.8181178	28.74855042	0	206.245697	0	0.841600001	218.2514038	161.4969025	42.61584091
76500	4642500	1	NW	1km	0	127.75	26.01000023	240000	-0.017278013	866.6064815	2837.206019	0	13547.59375	453.554726	27.93162918	49	203.7834015	0	0.681800008	219.1141052	164.2622986	45.22813034
76500	4646500	1	NW	1km	30000	125.53125	10.09799957	0	-0.031667328	1664.890625	4464.742188	360000	13828	433.1784985	36.63428116	49	178.0489044	0	1.215399981	232.8796997	190.597702	75.12963104
75500	4641500	1	NW	1km	0	154.546875	16.33499908	610000	-0.037641882	768.2838542	2638.981771	0	13627.5	426.1394218	29.2689209	0	207.4718933	0	0.933700025	217.7310944	160.7362976	41.94041824
75500	4640500	1	NW	1km	0	137.59375	14.00139999	120000	-0.057631397	621105	3474.54	60000	13577.40625	445.5498301	27.01696968	0	202.7519073	70000	1.228099942	219.7622986	165.9073029	46.70705032
74500	4664500	1	NW	1km	0	177375	32.66999817	0	-0.069240774	890.2421875	3416.75	0	13617375	469.1190668	31.31504059	0	212.561203	0	1.637099981	215.2337952	160.4264069	50.42639923
74500	4641500	1	NW	1km	0	212.015625	19.60199928	320000	-0.049641088	818.3333333	3667.007813	0	13689875	404.9488518	26.38072968	0	200.9720001	0	0.738099992	220.2384949	169.263504	51.37228012
74500	4640500	1	NW	1km	0	128125	16.33499908	0	0.029338378	732.7299107	3470.852679	250000	13656125	405.6977271	26.68685913	0	200.8348999	0	1.00999999	220.3242035	168.7248993	49.25027847
73500	4636500	1	NW	1km	0	137.28125	34.68000031	0	-0.018833466	616.3854167	2972.963542	0	13654.4375	439.0232624	29.62714958	49	210.7966003	90000	0.310400009	216.7035065	158.2241058	40.17134094
73500	4646500	1	NW	1km	0	134	50.49000168	70000	-0.026811995	1104.130682	2877.392045	0	13760375	444.3564665	27.70256042	49	205.8110046	0	0.274899989	218.7427979	166.4855957	50.22896957
73500	4640500	1	NW	1km	0	223.40625	20.19599915	0	-0.005675156	1476.160326	4762.866848	560000	13757625	389.3134964	37.01684952	0	197.3755035	0	1.000399947	221.9795074	174.0944061	55.8205719
73500	4641500	1	NW	1km	0	126.34375	10.09799957	10000	-0.067161735	1488.828125	4794.674107	430000	13739.9375	396.4455969	34.55556107	0	197.3522949	70000	1.637099981	223.1889038	174.5464935	57.06906128
72500	4641500	1	NW	1km	0	129.96875	19.60199928	0	-0.026952675	1356.076087	4031.103261	0	13759.6875	404.7663106	26.11488914	49	201.6405945	30000	0.775399983	221.1763	171.354599	52.36413956
72500	4639500	1	NW	1km	0	206	50.49000168	0	0.038980893	917.8032407	5133.747685	910000	13736.5625	393.9176174	37.01684952	0	220.2398987	90000	0.379799992	224.4277954	178.0285034	62.6991806
71500	4642500	1	NW	1km	0	134375	16.82999992	30000	-0.00225578	954.0027174	3108.752717	0	13635.75	453.6897918	29.01853943	49	209.9496002	0	0.806599975	215.9165955	161.0317993	44.23038864
71500	4643500	1	NW	1km	0	144.59375	24.50250053	0	0.005601828	1022.506696	2962.698661	0	13633.1875	458.4140144	28.69898987	49	209.6363068	0	0.291799992	215.7615967	162.1540985	45.69343948
71500	4641500	1	NW	1km	0	151.515625	32.66999817	0	-0.041710053	1215.804688	3261.447917	0	13757.6875	435.0483205	28.32790947	49	207.6996002	80000	0.292800009	217.1432037	163.9331055	46.81533813
71500	4636500	1	NW	1km	0	134.90625	50.49000168	0	-0.134131629	1021.333333	3358.613426	0	13746.6875	434.3787537	28.00666046	0	206.7752075	240000	0.559899986	217.2451019	163.9629059	46.22829056
71500	4637500	1	NW	1km	0	208.9375	49.00500107	0	0.000536	831.6458333	3310.398438	0	13748.25	422.1260409	27.83374977	0	206.3318939	0	0.553900003	217.8672028	164.1329041	46.76807022
71500	4638500	1	NW	1km	0	202.296875	24.50250053	0	0.032552083	523.6848958	4207.861979	450000	13796.28125	390.4511237	26.21665001	0	201.7234039	70000	1.166100025	220.4145966	170.3135071	54.5761795
70500	4665500	1	NW	1km	10000	199.5	50.49000168	0	-0.292555038	878.6331522	3698.608696	0	13640.8125	449.8457189	32.98735046	0	218.966095	0	0.369300008	223.2050934	155.4647064	48.0465889
70500	4664500	1	NW	1km	0	177.1875	50.49000168	0	-0.162828853	1014.393229	3882.153646	0	13571.3125	455.2316507	32.81766891	0	218.5621033	210000	0.507200003	212.9622955	156.3269958	48.62020111
70500	4666500	1	NW	1km	0	191.4375	26.01000023	0	-0.207028373	879.1696429	3648.642857	0	13623.5625	449.0093899	32.38507843	0	217.3549042	10000	0.619300008	213.0966949	159.2902069	50.80596161
70500	4722500	1	NW	1km	0	123.15625	33.65999985	0	-0.02866039	1325.508523	3770.1875	40000	13800.1875	420.9765978	35.0451889	0	213.1356049	0	0.144899994	208.9888	175.1000977	72.14530945
70500	4641500	1	NW	1km	0	165.75	33.65999985	0	0.01125	804.7125	2695465	0	13749875	445.7407471	29.5720005	49	212.5339966	30000	0.594699979	214.8560028	158.449295	42.02128983
69500	4664500	1	NW	1km	0	198.703125	19.60199928	0	-0.200807202	900.9027778	3856.969907	10000	13650.0625	448.2749707	32.59492111	0	219.1728973	70000	0.820100009	228.5641937	156.988205	48.98817825
69500	4663500	1	NW	1km	0	150.71875	25.24500084	0	-0.178428803	878.9947917	3783.541667	0	13665.4375	447.6646065	32.50791931	0	218.4485931	320000	0.632099986	224.4277954	158.1486969	50.34878159
69500	4662500	1	NW	1km	0	180.171875	32.66999817	0	-0.211747107	781.0989583	3560.71875	0	13682.84375	452.7881027	32.07550812	48	218.0581055	260000	0.575800002	213.8141022	158.2754974	50.15235901
69500	4665500	1	NW	1km	0	158.328125	24.50250053	0	-0.257438558	1006.317708	4331125	0	13613.0625	446.953626	32.28078079	0	217.901001	150000	1.000100017	213.5231018	159.423996	51.08459091
69500	4643500	1	NW	1km	0	142.9375	49.00500107	0	0.023971086	1234.332386	4255.309659	540000	13635875	456.4777226	28.16004944	49	208.6533051	0	0.690999985	216.0169067	164.8551941	50.49768066
67500	4663500	1	NW	1km	0	166625	52.02000046	0	-0.162012534	662.171875	2944.210938	0	13675.6875	455.5668056	33.93801117	0	222.8833008	10000	1.228099942	222.131897	151.3728027	44.37276077
67500	4664500	1	NW	1km	0	145.953125	50.49000168	0	-0.114637319	415.8559783	3475.921196	0	13630.3125	450.4493925	32.57521057	0	220.2398987	0	0.379799992	223.1889038	157.0923004	49.9901619
66500	4647500	1	NW	1km	0	140.96875	19.60199928	0	0.140086207	1783.87931	4921.178879	160000	13894.6875	424.1202678	35.72777176	49	220.0583038	0	0.494300008	228.5641937	194.9945984	84.56858826
64500	4682500	1	NW	1km	550000	155375	12.62250042	0	-0.004740906	2438.119792	5474.804688	450000	13875125	507.9330129	25.56179047	48	197.8099976	0	0.855199993	221.828598	194.5805969	86.16673279
4500	4762500	1	NW	1km	10000	143.0625	20.80800056	0	-0.113181074	1797.032609	5105.144022	360000	13915.8125	499.2577353	31.1366291	0	168.6687012	0	0.913500011	160.971405	174.7286072	98.6115036
1500	4766500	1	NW	1km	0	156875	9.180000305	0	-0.121090021	470.7161458	3583.115741	70000	13825.3125	505.9127958	31.98246956	43	170.5532074	0	0.643299997	161.9098969	171.1414032	95.2328186
500	4765500	1	NW	1km	0	183.0625	100.9800034	0	-0.048439027	59.28125	3037.485577	0	13925.0625	505.258092	31.91570091	43	168.2579956	0	0	161.1737976	171.857193	96.81024933
-500	4765500	1	NW	1km	0	161.3125	16.82999992	0	0.033904265	498.9537037	3087.917411	20000	13982.5625	498.1893479	29.36619949	43	155.819397	0	0.390500009	157.7382965	176.2357941	102.914299
