# Supplementary material for: Assessing the multi-scale predictive ability of ecosystem functional attributes for species distribution modelling
Source: PLoS One. 2018 Jun 18;13(6):e0199292. doi: 10.1371/journal.pone.0199292 (PMC6005496; doi:10.1371/journal.pone.0199292)
Supplement: S2 Dataset — (CSV) [file pone.0199292.s002.csv]

X	Y	Tb	Extent	Scale	agric	ALBmx	area_mn	baresoil	EVIdmxs	EVImn	EVImx	forest	LSTmn	LSTsd	PpDM	PpS	PpWM	scrubs	shdi	TAR	TmDQ	TmWQ
79500	4639500	1	NW	1km	0	174.6875	26.01000023	0	-0.088527353	311.1785714	6943.338542	0	13479.6875	488.5446404	34.52262115	0	221.8148041	0	0.630900025	227.0467987	219.2180023	70.13540649
78500	4638500	1	NW	1km	0	190.546875	98.01000214	0	-0.167663245	314.2395833	6748.252717	0	13574.9375	494.1405521	33.83871078	0	221.6266022	0	0	226.8094025	219.2180023	62.6991806
80500	4640500	1	NW	1km	0	208.9375	24.50250053	0	-0.217023876	396.4192708	2810.057292	0	13479	499.2577353	33.21731949	48	218.3226929	0	0.716899991	214.8634033	145.5406952	55.8205719
78500	4637500	1	NW	1km	0	180.8125	49.00500107	0	-0.043649089	670.125	6943.338542	0	13688.125	477.6289822	32.52565002	0	218.7402039	0	1.201500058	214.4996033	147.4736023	57.85593033
78500	4639500	1	NW	1km	0	165.03125	33.65999985	0	-0.047223892	277.7083333	2489.203125	0	13485.59375	482.2881238	32.13547134	48	214.9190979	80000	0.755100012	214.7436066	150.0946045	31.72913933
74500	4636500	1	NW	1km	0	142.4375	50.49000168	0	-0.079527223	476.835	2661.0525	0	13599.75	462.7379205	32.06129074	0	218.5706024	280000	0.59859997	221.9795074	148.9821014	80.98432159
75500	4636500	1	NW	1km	0	144.796875	33.65999985	0	-0.074815991	704.2986111	2578.8125	0	13583.625	472.8069324	31.5232296	0	215.8150024	20000	0.269600004	215.2151947	151.3128967	33.19718933
75500	4637500	1	NW	1km	0	145.4375	24.50250053	0	-0.19333097	747.4635417	2739.5625	0	13566.25	469.5709777	31.31071091	0	215.1896973	0	0.673500001	214.9584961	151.8103027	33.88824844
75500	4635500	1	NW	1km	0	202	49.00500107	0	-0.175033367	655.4036458	2476.382813	0	13656.625	473.9091346	31.2525692	49	216.7891998	40000	0.172099993	215.0057983	150.7532959	33.4948616
74500	4635500	1	NW	1km	0	195.6875	98.01000214	0	-0.118345999	579.9322917	6748.252717	0	13682.8125	459.8645342	31.2116909	0	216.8782959	0	0	224.4277954	150.8787994	34.1217308
75500	4638500	1	NW	1km	0	150.65625	98.01000214	0	-0.069751588	700.1901042	2646.085938	0	13585.8125	462.5584628	31.18951988	0	214.7590942	0	0	232.9850006	151.5767975	34.09886932
77500	4637500	1	NW	1km	0	169.15625	49.00500107	0	-0.066255235	810.2451923	2496.992788	0	13678.625	478.1672054	31.09380913	49	213.8609009	0	1.097300053	215.9481049	152.1390991	33.47573853
74500	4637500	1	NW	1km	0	135.8125	16.33499908	0	-0.047150809	695.3221154	2802.120192	0	13600.3125	445.937052	31.0551796	0	215.0531006	190000	0.814400017	214.533493	151.9468994	34.5728302
79500	4637500	1	NW	1km	0	184.1041667	100.9800034	0	-0.114903831	626.4320652	2492.410326	0	13693.5625	485.3190021	30.84456062	49	213.4403076	0	0	216.561203	151.7185059	33.15559006
77500	4640500	1	NW	1km	0	167.21875	32.66999817	720000	-0.089189352	719.2057292	2940.84375	0	13618.25	446.1625724	30.72670937	0	211.2751007	280000	0.628400028	216.6855927	154.451004	36.41107941
75500	4634500	1	NW	1km	0	194.21875	98.01000214	0	-0.107115718	836.7173913	2678.078804	0	13657.8125	474.0533866	30.39034081	49	215.0805054	0	0	215.577301	152.8871002	35.27745819
77500	4639500	1	NW	1km	0	168.90625	20.19599915	0	-0.075333863	380.5572917	2838.617188	0	13542.91667	482.8280824	29.95236969	0	210.4136963	230000	0.524800003	216.7830963	155.2745056	37.39266968
78500	4636500	1	NW	1km	0	163.5	33.65999985	0	-0.075711524	953.3725	2974.3675	0	13706.3125	472.9305364	29.75163078	49	210.6172028	0	0.543500006	217.2483978	155.7295074	36.44755936
74500	4634500	1	NW	1km	0	211.5	98.01000214	0	-0.061251832	747.9567308	6763.25	0	13689.5625	466.6257976	29.74942017	49	213.1492004	0	0	215.5836029	154.7120056	37.51773071
76500	4639500	1	NW	1km	0	175.125	26.01000023	0	-0.074886207	474.6175	2976.245	0	13637.5625	467.8944214	29.71446991	0	209.5187988	250000	0.576099992	217.0744934	156.4172058	38.61264038
73500	4636500	1	NW	1km	0	137.28125	34.68000031	0	-0.018833466	616.3854167	2972.963542	0	13654.4375	439.0232624	29.62714958	49	210.7966003	90000	0.310400009	216.7035065	158.2241058	40.17134094
73500	4635500	1	NW	1km	0	208.125	100.9800034	0	-0.046314088	841.46875	2562.195313	0	13731.3125	437.2861532	29.58205986	49	210.7303009	0	0	216.4178925	157.5966034	40.25382996
74500	4638500	1	NW	1km	0	138.25	32.66999817	0	-0.07089175	565.9192708	3097.716146	0	13569.0625	440.7638601	29.45689011	0	210.7646942	420000	0.676699996	216.1949005	156.6808014	39.08055115
75500	4633500	1	NW	1km	0	178.4375	100.9800034	0	0.004258671	928.3356481	2751.37037	0	13695.1875	471.4587002	29.27779961	49	211.8283997	0	0	217.4337006	156.1716003	37.45298004
76500	4635500	1	NW	1km	0	158.34375	50.49000168	0	-0.135300752	714.21875	2726.491071	0	13632.5	487.1196689	29.18943024	0	209.5464935	30000	1.228099942	217.2037048	157.3231049	38.79864883
76500	4636500	1	NW	1km	0	162.84375	34.68000031	0	0.020858383	781.4322917	2856.085938	0	13563.5	496.4361392	29.10327911	0	208.1116028	360000	0.65079999	217.0731964	158.7120056	40.06216049
79500	4636500	1	NW	1km	0	174.421875	34.68000031	0	-0.072720621	811.6339286	2808.825893	0	13682.78125	477.7565359	28.99558067	49	207.6007996	0	0.510800004	218.6096039	157.6329956	38.1424408
79500	4635500	1	NW	1km	0	186.765625	33.65999985	0	-0.066705044	764.9895833	2974.125	0	13730.625	476.6549415	28.84019089	0	207.7738037	0	0.67049998	219.1318054	158.2261963	38.5190506
76500	4640500	1	NW	1km	0	135.0208333	25.24500084	440000	-0.005532176	904.9895833	3282.020833	0	13582.29167	444.8181178	28.74855042	0	206.245697	0	0.841600001	218.2514038	161.4969025	42.61584091
74500	4639500	1	NW	1km	0	131.75	20.19599915	0	-0.050220338	919.2630208	3561.59375	20000	13559.8125	425.0661585	28.70469093	49	207.1141052	280000	0.889400005	217.9136963	160.8287964	42.85797882
74500	4633500	1	NW	1km	0	169.34375	100.9800034	0	-0.051958502	886.1298077	6763.25	0	13700.4375	459.4713047	28.33898926	0	208.5556946	0	0	216.7823944	159.7904968	41.10438919
73500	4637500	1	NW	1km	0	128.359375	14.42570019	0	-0.028480762	809.1325	3769.4275	0	13688.28125	428.0073514	28.28482056	49	206.2431946	640000	0.662800014	218.2373047	162.4898987	44.16345978
71500	4636500	1	NW	1km	0	134.90625	50.49000168	0	-0.134131629	1021.333333	3358.613426	0	13746.6875	434.3787537	28.00666046	0	206.7752075	240000	0.559899986	217.2451019	163.9629059	46.22829056
71500	4637500	1	NW	1km	0	122.65625	49.00500107	0	0.000536	831.6458333	3310.398438	0	13748.25	422.1260409	27.83374977	0	206.3318939	0	0.553900003	217.8672028	164.1329041	46.76807022
76500	4634500	1	NW	1km	0	141.4375	100.9800034	0	-0.053453853	857.1822917	2960.526042	0	13633.625	482.7945386	27.53321075	0	204.3271027	0	0	219.5386047	162.6728973	43.07714844
72500	4635500	1	NW	1km	0	157.546875	24.50250053	0	-0.080065873	1073.8125	3763.210648	380000	13775.75	416.2828394	27.53123093	0	205.4488068	0	0.667299986	218.9584045	164.4062958	45.91672134
77500	4635500	1	NW	1km	0	144.6875	49.00500107	0	-0.02860402	1015.081522	3121.355978	0	13602.75	482.463805	27.4412899	0	202.4553986	270000	0.569000006	219.9967041	163.6761017	44.10660934
75500	4640500	1	NW	1km	0	137.59375	14.00139999	120000	-0.057631397	621.105	3474.54	60000	13577.40625	445.5498301	27.01696968	0	202.7519073	70000	1.228099942	219.7622986	165.9073029	46.70705032
72500	4636500	1	NW	1km	0	138.78125	20.19599915	0	-0.055104828	914.4869792	4055.049479	90000	13750.15625	428.6460379	27.0016098	0	203.6835938	490000	0.954699993	219.5740967	166.4503937	47.73905945
73500	4638500	1	NW	1km	0	128.515625	33.65999985	0	0.058100656	744.6658654	4522.673077	260000	13691.6875	415.8122465	26.8046093	0	202.2875977	510000	1.051499963	220.0413971	167.0617981	48.23836899
74500	4640500	1	NW	1km	0	128.125	16.33499908	0	0.029338378	732.7299107	3470.852679	250000	13656.125	405.6977271	26.68685913	0	221.8148041	0	1.00999999	220.3242035	168.7248993	49.25027847
75500	4632500	1	NW	1km	0	161.5	49.00500107	0	-0.11580127	1204	3072.89	0	13756.875	449.538232	42.08966827	0	201.3280029	30000	0.138999999	220.385498	165.8769073	46.81283188
78500	4635500	1	NW	1km	0	138.375	19.60199928	0	-0.0982355	1144.075521	3184.575521	0	13720.5	469.5782027	42.08966827	0	221.6266022	0	1.097300053	221.204895	166.2378998	46.00112915
72500	4637500	1	NW	1km	0	123.65625	16.33499908	0	-0.040526505	1120.471354	4052.763021	360000	13694.9375	426.3939749	41.19509888	0	201.2687988	160000	1.201500058	220.4633942	169.7312012	50.59730911
72500	4638500	1	NW	1km	0	124.1875	24.50250053	0	-0.002230762	1135.455	5045.0375	360000	13730.0625	412.4853285	42.08966827	0	221.8148041	420000	1.064800024	221.0957031	170.8379059	52.05847168
73500	4640500	1	NW	1km	0	124.25	20.19599915	0	-0.005675156	1476.160326	4762.866848	560000	13757.625	496.4361392	41.19509888	0	221.8148041	0	1.000399947	221.9795074	174.0944061	55.8205719
72500	4639500	1	NW	1km	0	122.59375	50.49000168	0	0.038980893	917.8032407	5133.747685	910000	13736.5625	499.2577353	40.93700027	0	221.6266022	90000	0.314799994	224.4277954	178.0285034	62.6991806
75500	4631500	1	NW	1km	0	145.59375	24.50250053	0	-0.178541288	1542.375	3778.154891	20000	13882.0625	414.669096	42.08966827	50	218.7402039	0	0.519999981	226.8094025	177.7519989	57.85593033
70500	4638500	1	NW	1km	0	88.21875	25.24500084	0	-0.100534161	257.9140625	2908.231771	390000	13908	494.1405521	41.19509888	50	218.5706024	0	0.865499973	227.0467987	184.4031982	70.13540649
70500	4631500	1	NW	1km	330000	127.28125	25.24500084	0	-0.036919048	1768.729167	4795.3125	670000	13928.625	396.8098398	40.93700027	50	218.3226929	0	0.966099977	232.9850006	194.9806976	80.98432159
182500	4745500	1	NW	1km	0	392.203125	49.00500107	0	-0.320237352	392.1979167	5589.627604	610000	13507.8125	400.9879491	42.08966827	35	151.1450043	0	0.662299991	243.2313995	219.2180023	111.8834
182500	4746500	1	NW	1km	0	298.46875	32.66999817	0	-0.300917163	454.3616071	5964.607143	890000	13513	393.2639195	41.19509888	35	148.5498962	0	0.327300012	242.9795074	219.2180023	111.8834
99500	4849500	1	NW	1km	0	175.4375	20.19599915	0	-0.091861955	2131.127604	6943.338542	40000	13700.875	310.2582083	40.93700027	0	151.6472931	30000	0.888599992	176.9369965	162.006897	81.00684357
102500	4853500	1	NW	1km	0	137.96875	19.60199928	0	-0.261967445	846.296875	5771.927083	0	13837.9375	529.2543707	40.79082108	35	149.3724976	140000	0.916999996	175.790802	162.418396	81.69611359
102500	4851500	1	NW	1km	0	156.765625	19.60199928	0	-0.291129763	1786.815	4850.9025	30000	13798.53125	303.4543128	40.42031097	35	149.1987	0	0.58950001	176.0151978	162.983902	81.63394165
100500	4849500	1	NW	1km	0	176.53125	20.80800056	0	-0.198921723	1876.201087	6532.146739	0	13742.125	314.8570715	39.9239006	0	149.3612061	0	0.591799974	176.5894012	163.5626984	82.56273651
100500	4850500	1	NW	1km	270000	169.5	11.22000027	0	-0.109217488	1830.50431	6594.609914	220000	13758.4375	303.6095102	39.4980011	35	147.9810028	0	1.305699944	245.1340942	164.5169983	83.7232666
100500	4851500	1	NW	1km	110000	156.34375	10.09799957	0	-0.201153811	1415.675	5715.4225	220000	13758.0625	553.4670738	39.47312927	35	147.3069	0	1.434599996	174.6858978	164.6170959	84.69313812
182500	4744500	1	NW	1km	0	395.96875	33.65999985	0	-0.277736029	190.0104167	5616.598958	540000	13505.1875	414.8514368	39.34204865	35	145.0061035	0	0.691600025	244.3759003	145.9938965	22.00386047
189500	4686500	1	NW	1km	0	426.90625	24.50250053	0	-0.286264651	3068.234375	3240.739583	0	13332.75	529.2543707	39	37	151	0	0.676400006	254	215.7619019	107
103500	4855500	1	NW	1km	0	88.21875	34.68000031	0	0.048480762	28.60397436	6738.460227	0	13959.09375	529.2543707	39	35	218.7402039	0	0.532000005	174	165	85
141500	4835500	1	NW	1km	0	158.953125	16.33499908	0	-0.285292945	1779.866848	5176.44837	330000	13718.6875	343.0700301	38.98482132	34	138.7498932	0	0.947300017	193.0435944	166.9434967	75.9434433
143500	4836500	1	NW	1km	0	149	24.50250053	0	-0.170364564	1886.25625	5136.658333	780000	13773.875	310.8696078	38.90764999	34	137.8153076	0	1.159700036	193.4125061	167.199707	76.24585724
184500	4751500	1	NW	1km	0	215.78125	14.42570019	0	-0.220683757	611.4666667	5994.80625	730000	13452	415.9330953	38.7735405	35	139.7073975	60000	0.713699996	243	149.6793976	26.67938995
168500	4728500	1	NW	1km	150000	203.375	19.60199928	0	-0.279904203	365.6420455	5215.877841	460000	13490.5	403.336598	38.60868073	0	154.1880035	0	1.011700034	243.3677979	145.1535034	111.8834
98500	4850500	1	NW	1km	0	152.71875	7.539199829	0	-0.090261078	1127.200521	5845.091146	0	13792.25	553.4670738	38.31871033	0	145.3143005	280000	1.421700001	173.4589996	166.5023041	87.32816315
161500	4723500	1	NW	1km	0	296.5	50.49000168	0	-0.300936459	404.9453125	4533.393229	170000	13477.25	425.8844996	38.30772018	0	158.8516998	0	0.444799989	240.9649048	145.1483002	21.80212021
101500	4849500	1	NW	1km	270000	163.84375	11.22000027	0	-0.205810701	1986.566964	6670.066964	170000	13697.5625	321.7806199	38.29764938	0	143.9425049	0	1.387799978	174.6734924	167.7595978	87.43332672
161500	4724500	1	NW	1km	0	245.34375	16.33499908	0	-0.235975877	108.5338542	3905.072917	80000	13448.0625	421.1662832	38.19316864	0	158.3771973	0	0.352600008	241.4750977	145.6228027	22.42111969
181500	4744500	1	NW	1km	0	293.890625	26.01000023	0	-0.25165003	452.3472222	6164.805556	640000	13527.96875	400.7390325	38.06182098	0	142.4358978	0	0.647099972	244.4129944	149.2705994	25.35185051
108500	4835500	1	NW	1km	370000	163.5625	10.89000034	0	-0.165246049	2129.416667	6144.169271	520000	13708.3125	320.5035311	37.74980927	36	144.8253021	0	0.985099971	181.2265015	168.5381927	85.02365875
102500	4850500	1	NW	1km	0	148.5	19.60199928	0	-0.285984194	1705.705729	6081.492188	750000	13786.03125	289.5441321	37.6608696	0	141.6083984	0	0.763100028	173.5397034	169.3970032	89.14394379
143500	4835500	1	NW	1km	0	152.78125	49.00500107	0	-0.044806696	1978.625	5046.411458	680000	13821.375	324.4248465	37.64588165	50	134.3103027	0	0.645600021	192.6643982	171.3253937	79.99775696
108500	4834500	1	NW	1km	90000	162.96875	33.65999985	0	-0.243540305	2348.960417	6024.189583	760000	13740.9375	322.0926476	37.60855103	36	144.6725006	0	0.714100003	182.2543945	169.1371002	84.36475372
108500	4833500	1	NW	1km	30000	151.46875	16.33499908	0	-0.101630936	1528.361979	6070.830729	0	13770	320.6320406	37.55490112	36	144.3574066	0	0.703999996	182.1165009	169.6094055	85.00068665
163500	4724500	1	NW	1km	0	323.84375	20.19599915	0	-0.200573684	349.2175	4628.4275	170000	13492.84375	414.64422	37.53281021	0	155.5021057	0	0.423799992	242.9037018	146.4978943	107
180500	4745500	1	NW	1km	0	325.46875	32.66999817	0	-0.263107607	807.2552083	5602.734375	360000	13552.25	389.1678286	37.45613098	0	140.3451996	0	0.648500025	243.660202	151.6548004	28.27894974
166500	4727500	1	NW	1km	0	238.875	25.24500084	0	-0.352627514	616.9427083	6047.736979	690000	13569.02083	388.498643	37.26240921	38	152.1779022	0	0.614899993	242.9154968	148.4268951	110
142500	4836500	1	NW	1km	0	142.65625	33.65999985	0	-0.213292003	1538.423077	5368.382212	980000	13815.1875	304.7483937	37.12567139	50	134.2756042	0	0.600600004	192.063797	171.6867981	80.66059113
168500	4726500	1	NW	1km	0	266.84375	12.62250042	0	-0.493466424	598.0576923	4956.569712	680000	13516.84375	395.9262585	37	38	152	0	0.997099996	245	147	107
100500	4853500	1	NW	1km	0	69.0625	50.49000168	0	-0.073041143	-190.9642857	6943.338542	0	14025.75	499.2577353	37	36	221.8148041	0	0.480800003	257	183	107
163500	4725500	1	NW	1km	0	263.109375	33.65999985	0	-0.188172735	59.28125	4982.671875	460000	13520.5	406.131397	36.81407166	38	153.2086029	0	0.690599978	242.7664032	148.7913971	25.79136086
141500	4836500	1	NW	1km	0	149.890625	24.50250053	0	-0.200769528	1808.200521	5829.713542	0	13747.15625	317.2461987	36.6955986	50	133.8822937	0	0.53640002	189.7792969	172.0805054	81.9968338
153500	4731500	1	NW	1km	0	224.25	19.60199928	0	-0.292338112	631.4	4153.1825	20000	13667.5	398.3976002	36.65129852	39	157.3083038	680000	0.698899984	237.4496002	151.5964966	30.59653091
141500	4837500	1	NW	1km	0	157.03125	50.49000168	0	-0.267926575	2173.084052	6234.956897	970000	13815.5625	289.5530491	36.52391052	0	133.571701	0	0.116700001	189.5238953	172.428299	82.90131378
107500	4833500	1	NW	1km	70000	151.9140625	14.00139999	0	-0.044544307	1695.980978	6124.470109	660000	13782.625	322.1738705	36.33858871	36	141.7050018	250000	0.922299981	180.5431976	171.9136047	87.94193268
167500	4726500	1	NW	1km	20000	282.5	14.42570019	0	-0.359555259	780.2864583	6000.463542	690000	13504.625	395.2509513	36.20278931	0	149.0070038	0	0.800599992	244.199295	150.9929962	26.79372978
154500	4731500	1	NW	1km	40000	217.796875	16.82999992	0	-0.224606019	518.1145833	4937.432292	0	13599.3125	400.7176783	36.14683914	39	156.1168976	180000	1.144999981	238.1799011	152.0460052	31.37961006
107500	4834500	1	NW	1km	0	161.515625	16.82999992	0	-0.160376588	2192.675	6490.5475	840000	13785.625	318.5355478	36.06534958	36	140.2993011	60000	0.562399983	179.6080933	172.4120026	88.80394745
189500	4685500	1	NW	1km	0	367.21875	32.66999817	0	-0.290979616	-267.8194444	3737.946759	0	13332.0625	553.4670738	36	38	144	0	0.068700001	257	215.7619019	110
105500	4834500	1	NW	1km	90000	158.96875	50.49000168	0	-0.018791651	2028.295	6091.875	910000	13826.64583	324.3388809	35.8781395	36	139.6343994	0	0.308699995	178.6475983	173.4076996	90.63826752
180500	4744500	1	NW	1km	0	218.25	33.65999985	0	-0.10947032	536.1637931	6443.482759	870000	13583.3125	404.4661721	35.79172134	0	136.1811981	0	0.408100009	244.5648956	155.7881012	31.2845993
107500	4835500	1	NW	1km	60000	153.65625	19.60199928	0	-0.191248044	1975.885776	5869.885776	940000	13809.125	306.2465369	35.69425964	36	139.2942963	0	0.279799998	178.9633026	172.6690063	89.91722107
143500	4837500	1	NW	1km	0	144.6875	33.65999985	0	-0.190888724	1906.752604	5568.479167	980000	13817.5625	294.3811353	35.67790985	0	131.1387939	0	0.203299999	189.4037018	174.4680023	85.18327332
102500	4854500	1	NW	1km	0	113.40625	24.50250053	0	-0.07321546	422.3541667	4564.033854	0	13899.4375	553.4670738	35.67679977	0	136.0491943	0	0.314200014	254	173.1696014	95.29960632
160500	4724500	1	NW	1km	0	177.34375	14.42570019	0	-0.189449769	363.6927083	3980.604167	40000	13495.9375	411.6078884	35.63341141	0	151.6876984	0	0.176699996	242.6555939	152.658493	29.31226921
106500	4833500	1	NW	1km	0	153.96875	33.65999985	0	-0.063570508	1786.13	6309.185	990000	13806.5	327.7440639	35.5977211	36	138.2606964	0	0.050900001	179.0110016	174.3587036	91.34234619
167500	4728500	1	NW	1km	0	189.34375	32.66999817	0	-0.27108874	592.40625	5923.679688	830000	13531.4375	399.004532	35.46022034	0	148.5034943	0	0.449800014	244.2471008	152.4532013	27.37578964
105500	4835500	1	NW	1km	320000	156.59375	14.00139999	0	-0.075053406	2241.466146	6240.033854	680000	13845.84375	309.5278439	35.33377075	36	136.8825989	0	0.633899987	177.1107941	174.7902069	92.55541229
163500	4723500	1	NW	1km	0	284.03125	10.40400028	0	-0.487347392	659.3533654	5243.831731	90000	13522.09375	411.0873608	35.27748871	0	149.762207	0	1.215800047	244.3260956	153.0305023	28.45936966
155500	4733500	1	NW	1km	0	256.625	14.00139999	0	-0.277761078	435.6744792	6153.783854	720000	13632.6875	380.146088	35.2677803	39	152.7937012	20000	0.675199986	239.0097046	155.2102051	33.923069
106500	4834500	1	NW	1km	260000	157.640625	14.86289978	0	-0.071334127	2278.041667	6252.778646	740000	13845.34375	315.9066726	35.22808838	36	137.9416046	0	0.57160002	178.1472931	174.3305969	91.9776001
159500	4723500	1	NW	1km	0	173.046875	14.42570019	0	-0.258326397	470.0991379	3799.508621	380000	13610.625	408.3824477	35.17562103	39	152.9149933	190000	1.297799945	242.2321014	152.5384064	28.9349308
142500	4837500	1	NW	1km	90000	147.46875	26.01000023	0	-0.199034142	2053.90625	5881.625	910000	13808.4375	291.5839806	35.04143906	34	221.8148041	0	0.333400011	187.9436035	176.9736023	88.88530731
184500	4753500	1	NW	1km	260000	311.671875	13.00500011	0	-0.124538389	743.2309783	6748.252717	430000	13585.53125	393.8691749	35	35	134	20000	1.189100027	243	155	33
184500	4752500	1	NW	1km	260000	205.78125	12.62250042	0	-0.041293892	632.2527174	6431.9375	550000	13508.5625	411.3995755	35	35	131	180000	1.236400008	244	157	35
161500	4725500	1	NW	1km	0	199.578125	19.60199928	0	-0.178069176	676.2165179	4805.741071	240000	13552.5625	404.7506938	34.82089996	0	149.5675049	0	0.553900003	243.0845947	154.5644989	30.49027061
106500	4836500	1	NW	1km	0	152.0625	100.9800034	0	-0.22723911	1724.203704	6201.032407	0	13784	305.5343677	34.77944946	36	135.0572968	0	0	176.5404968	176.2413025	94.24134064
180500	4746500	1	NW	1km	0	187.21875	14.00139999	0	-0.119255804	423.5416667	6277.432292	820000	13619.34375	385.912367	34.76467133	0	134.2274933	0	0.488999993	244.3262024	157.7572021	33.80580902
155500	4732500	1	NW	1km	60000	243.3125	14.42570019	0	-0.327601276	1016.482143	6763.25	590000	13573.6875	384.6418243	34.59947968	39	151.0825958	0	0.878199995	239.3865051	157.2606964	34.89582062
98500	4851500	1	NW	1km	0	136.25	12.25119972	0	0.082075318	960.4475	5764.725	0	13781.875	529.2543707	34.57561111	0	135.2380066	10000	0.986199975	246	174.7619934	97.6166687
86500	4810500	1	NW	1km	230000	155.21875	25.24500084	0	-0.111437537	2387.1875	5506.821759	770000	13912.125	339.0028312	34.52022171	0	148.7787018	0	0.860499978	179.7382965	177.4797974	93.95955658
154500	4732500	1	NW	1km	220000	194.71875	14.86289978	0	-0.225899604	844.1931818	6334.840909	250000	13611.0625	393.5472439	34.38010025	39	151.1082001	70000	1.226199985	239.3159027	157.4729004	36.12493134
183500	4753500	1	NW	1km	130000	265.1770833	12.62250042	30000	-0.130273882	862.8522727	6738.460227	840000	13627.54167	399.363547	34.20404816	35	221.8148041	0	0.69630003	243.7205048	162.2333984	38.96059036
182500	4751500	1	NW	1km	0	223.53125	24.50250053	0	-0.19452123	400.8203125	6089.010417	820000	13568.46875	406.7084364	34.11463165	0	129.9062042	0	0.460000008	243.1143951	160.7637939	37.87158966
106500	4835500	1	NW	1km	0	152.53125	25.24500084	0	-0.217329244	2125.002404	6327.079327	0	13842.125	301.5357288	33.95394897	36	134.4967957	0	0.298400015	176.1717987	176.8742981	94.87426758
105500	4836500	1	NW	1km	20000	153.90625	49.00500107	0	-0.180594122	2123.606481	6247.164352	980000	13931.5625	299.900766	33.90774155	36	133.0935974	0	0.0647	245.1215057	177.5516968	96.12669373
166500	4728500	1	NW	1km	190000	184.53125	33.65999985	0	-0.21519631	602.7	6130.739583	680000	13516.1875	405.5145678	33.79290009	0	143.4078064	0	0.843299985	245.1215057	158.0888977	32.91080093
86500	4809500	1	NW	1km	390000	152.515625	12.25119972	0	-0.103767676	2405.799479	5513.507813	610000	13844.5625	346.039312	33.7469101	0	147.2917023	0	1.081900001	179.2917023	178.5559998	95.50617981
86500	4808500	1	NW	1km	350000	156.234375	24.50250053	0	-0.001740381	2263.1	5960.39	650000	13843.15625	356.8283472	33.63515854	0	146.4073029	0	0.656000018	178.8686981	179.2306976	96.36197662
85500	4808500	1	NW	1km	0	167.40625	16.82999992	0	0.247557395	2455.0625	6156.927083	0	13878.8125	342.2251521	33.58546066	0	148.4490051	0	0.692399979	178.9174957	178.1950073	95.60949707
84500	4808500	1	NW	1km	0	161.734375	16.33499908	0	0.266394894	2318.798913	6100.711957	0	13893.21875	331.6479434	33.52698135	0	148.1963959	0	1.027199984	179.0684052	178.783493	96.09406281
168500	4729500	1	NW	1km	140000	207.09375	16.82999992	0	-0.293660254	643.2675	6136.2625	10000	13537.1875	409.4202027	33.2353096	38	140.0279999	0	0.726400018	245.9355927	159.0364075	34.03639984
154500	4733500	1	NW	1km	70000	229.3125	9.180000305	0	-0.335580913	697.1145833	6118.497917	0	13650.40625	384.8216374	33.22557068	39	146.9662018	230000	1.255399942	239.195694	161.3748932	40.19556046
155500	4731500	1	NW	1km	150000	175.84375	19.60199928	0	-0.140114614	867.5706522	6498.035326	850000	13579.3125	399.4278979	33.16788101	39	146.9723053	0	0.442600012	239.7478027	161.5699005	38.89574051
84500	4810500	1	NW	1km	0	152.078125	16.82999992	0	0.12725578	2540.021739	6108.307065	0	13917.75	322.204274	33.0868187	0	144.260498	0	0.754999995	176.2902069	179.8332062	97.82636261
163500	4726500	1	NW	1km	0	160.1875	10.40400028	0	-0.210490381	492.725	6243.555	0	13637.8125	387.2505606	33.00151062	0	143.5803986	260000	0.736899972	244.1846008	159.0119019	34.82725143
182500	4753500	1	NW	1km	360000	231.96875	14.42570019	70000	-0.07321546	1118.947917	6418.434896	550000	13646.1875	403.0131088	32.57263184	35	218.5706024	20000	0.977900028	243.0581055	165.1549988	42.79663849
160500	4725500	1	NW	1km	0	181.9375	9.180000305	0	-0.28510735	701.4675	5069.81	180000	13590.1875	406.0391512	32.27893829	0	143.111496	260000	1.025200009	244.0491943	161.7167969	37.57947922
84500	4809500	1	NW	1km	160000	150.453125	19.60199928	0	-0.014358968	2243.758333	5854.66875	840000	13909.53125	322.4744096	32.18648911	0	142.3791046	0	0.99059999	245.3374023	181.2774963	99.49465179
102500	4855500	1	NW	1km	0	62.90625	50.49000168	0	0.094138611	44.75932692	6763.25	0	14011.125	494.1405521	32	36	221.6266022	0	0.159700006	245.9723969	183	107
101500	4855500	1	NW	1km	0	59.515625	50.49000168	0	-0.004724894	49.64111111	6748.252717	0	13978.6875	496.4361392	32	36	145	0	0.272700012	245.9355927	183	107
182500	4752500	1	NW	1km	280000	260	14.00139999	0	-0.073698604	688.9762931	6504.228448	590000	13605.4375	405.2404154	31.89863014	0	218.3226929	130000	1.024600029	243.0628052	166.9855957	44.07715988
159500	4724500	1	NW	1km	10000	186.46875	24.50250053	0	-0.136949107	521.2864583	4421.356771	150000	13602.6875	406.3196819	31.67155075	0	142.7290039	0	0.550499976	243.8339996	162.9042969	38.27099991
167500	4729500	1	NW	1km	210000	211	9.180000305	0	-0.19259724	745.5482955	5829.221591	170000	13625	408.59128	30.79754066	0	135.3856049	0	0.917599976	245.9723969	165.5798035	39.60736084
166500	4729500	1	NW	1km	0	235.65625	13.00500011	0	-0.078682251	787.25	6533.735795	380000	13548.875	419.5194578	30.71495056	0	134.476593	0	1.116700053	245.3374023	166.5350037	41.19762039
159500	4725500	1	NW	1km	280000	152.09375	10.89000034	0	-0.064287848	717.5234375	5251.945313	150000	13643.4375	406.1307148	28.98925972	0	135.1994934	30000	1.085500002	245.1340942	170.8005066	45.80049896
162500	4727500	1	NW	1km	260000	158.90625	14.00139999	0	0.079540122	1194.801339	6404.225446	530000	13647.75	393.6770993	28.51475906	0	131.7987061	210000	1.038300037	245.4537964	171.9440002	46.31795883
161500	4727500	1	NW	1km	10000	153.625	19.60199928	0	0.053385417	916.1953125	6555.700521	810000	13670.5	398.0527188	27.02371025	0	221.6266022	160000	0.549499989	246	177.5697937	51.67140961
